# Supplementary material for: Curcumin-based ionic Pt(ii) complexes: antioxidant and antimicrobial activity
Source: Royal Society of Chemistry journal article supplement (doi:10.1039/d2dt01653b), 2022-01-01
Supplement: d2dt01653b1.pdf [file d2dt01653b1.pdf]

Supporting information

**Curcumin based ionic Pt(II) complexes:  
antioxidant and antimicrobial activity**

Rossella Caligiuri,<sup>a</sup> Giuseppe Di Maio,<sup>a,b</sup> Nicolas Godbert,<sup>a</sup> Francesca Scarpelli,<sup>a</sup> Angela Candreva,<sup>a</sup> Isabella Rimoldi,<sup>c</sup> Giorgio Facchetti,<sup>c</sup> Maria Giovanna Lupo,<sup>d</sup> Emilia Sicilia,<sup>e</sup> Gloria Mazzone,<sup>e</sup> Fortuna Ponte,<sup>e</sup> Isabella Romeo,<sup>f,g</sup> Massimo La Deda,<sup>a,b</sup> Alessandra Crispini,<sup>a</sup> Renata De Rose<sup>h</sup> and Iolinda Aiello<sup>\*a,b</sup>

<sup>a</sup> MAT-INLAB, LASCAMM CR-INSTM, Unità INSTM della Calabria, Dipartimento di Chimica e Tecnologie Chimiche, Università della Calabria, Ponte Pietro Bucci Cubo 14C, Arcavacata di Rende (CS), 87036, Italy, E-mail: [iolinda.aiello@unical.it](mailto:iolinda.aiello@unical.it)

<sup>b</sup> CNR NANOTEC-Istituto di Nanotecnologia UOS Cosenza, Arcavacata di Rende (CS), 87036, Italy

<sup>c</sup> Dipartimento di Scienze Farmaceutiche, Università degli Studi di Milano, Via Venezian 21, Milan, 20133, Italy

<sup>d</sup> *Dipartimento di Medicina, Università degli Studi di Padova, 35128 Padova, Italy*

<sup>e</sup> *Dipartimento di Chimica e Tecnologie Chimiche, Ponte Pietro Bucci Cubo 14C, Arcavacata di Rende (CS), 87036, Italy*

<sup>f</sup> Dipartimento di Scienze della Salute, Università degli Studi "Magna Græcia" di Catanzaro, Campus "S. Venuta", Viale Europa, 88100 Catanzaro, Italy

<sup>g</sup> Net4Science Academic Spin-Off, Università degli Studi "Magna Græcia" di Catanzaro, Campus "S. Venuta", Viale Europa, 88100 Catanzaro, Italy

<sup>h</sup> LAB CF-INABEC Dipartimento di Chimica e Tecnologie Chimiche, Ponte Pietro Bucci Cubo 15C, Arcavacata di Rende (CS), 87036, Italy

## Table of Contents

**Figure S1:** Absorption spectra of DPPH in MeOH dilute solution (100  $\mu\text{M}$ ) varying time

**Figure S2:** FT-IR spectrum of complex [(pn)Pt(curc)][CF<sub>3</sub>SO<sub>3</sub>], **1**

**Figure S3:** <sup>1</sup>H-NMR spectrum of complex [(pn)Pt(curc)][CF<sub>3</sub>SO<sub>3</sub>], **1**

**Figure S4:** <sup>13</sup>C-NMR spectrum of complex [(pn)Pt(curc)][CF<sub>3</sub>SO<sub>3</sub>], **1**

**Figure S5:** ESI-MS spectrum of complex [(pn)Pt(curc)][CF<sub>3</sub>SO<sub>3</sub>], **1**

**Figure S6:** FT-IR spectrum of complex [(pic)Pt(curc)][CF<sub>3</sub>SO<sub>3</sub>], **2**

**Figure S7:** <sup>1</sup>H-NMR spectrum of complex [(pic)Pt(curc)][CF<sub>3</sub>SO<sub>3</sub>], **2**

**Figure S8:** <sup>13</sup>C-NMR spectrum of complex [(pic)Pt(curc)][CF<sub>3</sub>SO<sub>3</sub>], **2**

**Figure S9:** ESI-MS spectrum of complex [(pic)Pt(curc)][CF<sub>3</sub>SO<sub>3</sub>], **2**

**Figure S10:** FT-IR spectrum of complex [(bipy)Pt(curc)][CF<sub>3</sub>SO<sub>3</sub>], **3**

**Figure S11:** <sup>1</sup>H-NMR spectrum of complex [(bipy)Pt(curc)][CF<sub>3</sub>SO<sub>3</sub>], **3**

**Figure S12:** <sup>13</sup>C-NMR spectrum of complex [(bipy)Pt(curc)][CF<sub>3</sub>SO<sub>3</sub>], **3**

**Figure S13:** ESI-MS spectrum of complex [(bipy)Pt(curc)][CF<sub>3</sub>SO<sub>3</sub>], **3**

**Figure S14:** FT-IR spectrum of complex [(bipy-C<sub>9</sub>)Pt(curc)][CF<sub>3</sub>SO<sub>3</sub>], **4**

**Figure S15:** <sup>1</sup>H-NMR spectrum of complex [(bipy-C<sub>9</sub>)Pt(curc)][CF<sub>3</sub>SO<sub>3</sub>], **4**

**Figure S16:** <sup>13</sup>C-NMR spectrum of complex [(bipy-C<sub>9</sub>)Pt(curc)][CF<sub>3</sub>SO<sub>3</sub>], **4**

**Figure S17:** ESI-MS spectrum of complex [(bipy-C<sub>9</sub>)Pt(curc)][CF<sub>3</sub>SO<sub>3</sub>], **4**

**Figure S18:** Simulated absorption spectra of H(curc) (violet) and complexes **1** (blue), **2** (red), **3** (orange) and **4** (green) in implicit solvent methanol.

**Table S1:** Absorption wavelength ( $\lambda$ , nm), oscillator strength (f), MO contribution (%) for **H(curc)** and complexes **1-4**.

**Figure S19:** Natural Transition Orbitals (NTOs) for the main excitations of Pt(II) complexes **1-4**.

**Figure S20:** Absorption spectra of H(curc) in MeOH dilute solution (10  $\mu\text{M}$ ) varying time.

**Figure S21:** Absorption spectra of complex **1** in MeOH dilute solution (10  $\mu\text{M}$ ) varying time.

**Figure S22:** Absorption spectra of complex **2** in MeOH dilute solution (10  $\mu\text{M}$ ) varying time.

**Figure S23:** Absorption spectra of complex **3** in MeOH dilute solution (10  $\mu\text{M}$ ) varying time.

**Figure S24:** Absorption spectra of complex **4** in MeOH dilute solution (10  $\mu\text{M}$ ) varying time.

**Figure S25:** Absorption spectra of H(curc) in DMSO dilute solution (10  $\mu\text{M}$ ) varying time.

**Figure S26:** Absorption spectra of complex **1** in DMSO dilute solution (10  $\mu\text{M}$ ) varying time.

**Figure S27:** Absorption spectra of complex **2** in DMSO dilute solution (10  $\mu\text{M}$ ) varying time.

**Figure S28:** Absorption spectra of complex **3** in DMSO dilute solution (10  $\mu\text{M}$ ) varying time.

**Figure S29:** Absorption spectra of complex **4** in DMSO dilute solution (10  $\mu\text{M}$ ) varying time.

**Figure S30:** Absorption spectra of H(curc) in 10% DMSO/PBS dilute solution (10  $\mu\text{M}$ ) varying time.

**Figure S31:** Absorption spectra of complex **1** in 10% DMSO/PBS dilute solution (10  $\mu\text{M}$ ) varying time.

**Figure S32:** Absorption spectra of complex **2** in 10% DMSO/PBS dilute solution (10  $\mu\text{M}$ ) varying time.

**Figure S33:** Absorption spectra of complex **3** in 10% DMSO/PBS dilute solution (10  $\mu\text{M}$ ) varying time.

**Figure S34:** Absorption spectra of complex **4** in 10% DMSO/PBS dilute solution (10  $\mu\text{M}$ ) varying time.

**Figure S35:** Thermodynamic parameters: bond dissociation enthalpies (BDE, grey), electron transfer enthalpies (ETE, light violet), adiabatic ionization potentials (IP, red), O-H proton dissociation enthalpies (PDE, blue) and proton affinities (PA, green), at 298.15 K.

**Table S2:** ADME properties for H(curc) and Pt(II) complexes **1-4**.

**Table S3:** Theoretical and experimental  $\log P_{ow}$  values of the Pt(II) complexes **1-4**.

**Figure S36:** BOILED-Egg Model of complexes **1-3**.

**Table S4:** Antimicrobial activity data against *E. coli* and *S. aureus*.

**Figure S37:** Inhibition halos on *S. aureus* (A) and *E. Coli* (B) at 0.5  $\mu\text{g}/\mu\text{l}$ . C: H(curc).

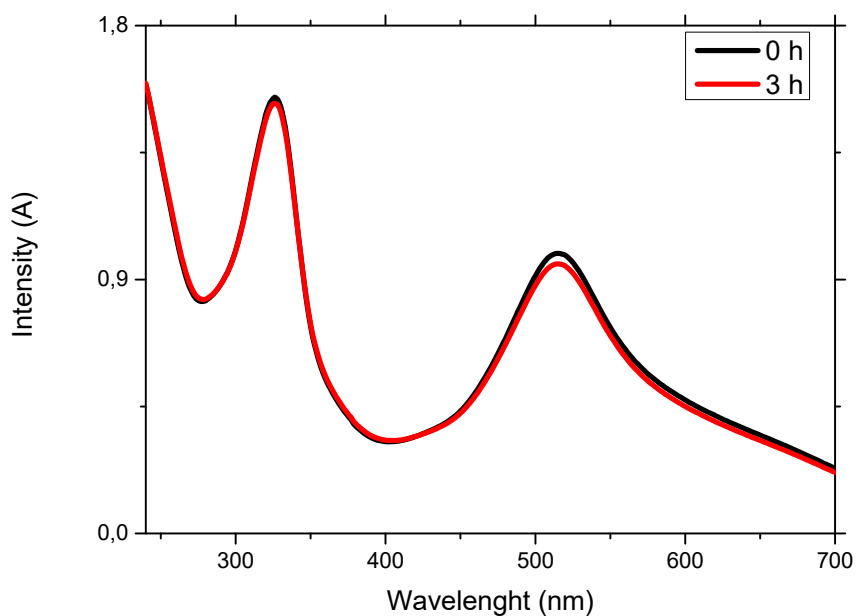

**Figure S1:** Absorption spectra of DPPH in MeOH dilute solution (100  $\mu\text{M}$ ) varying time.

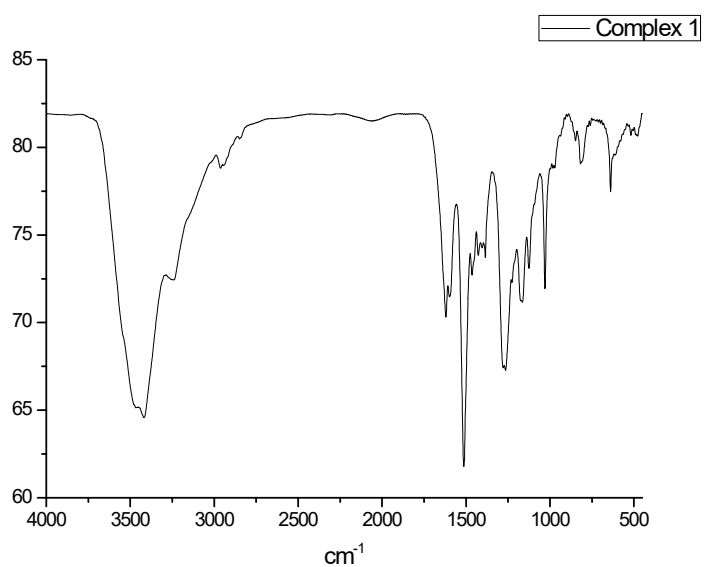

**Figure S2:** FT-IR spectrum of complex  $[(pn)Pt(curc)][CF_3SO_3]$ , **1**.

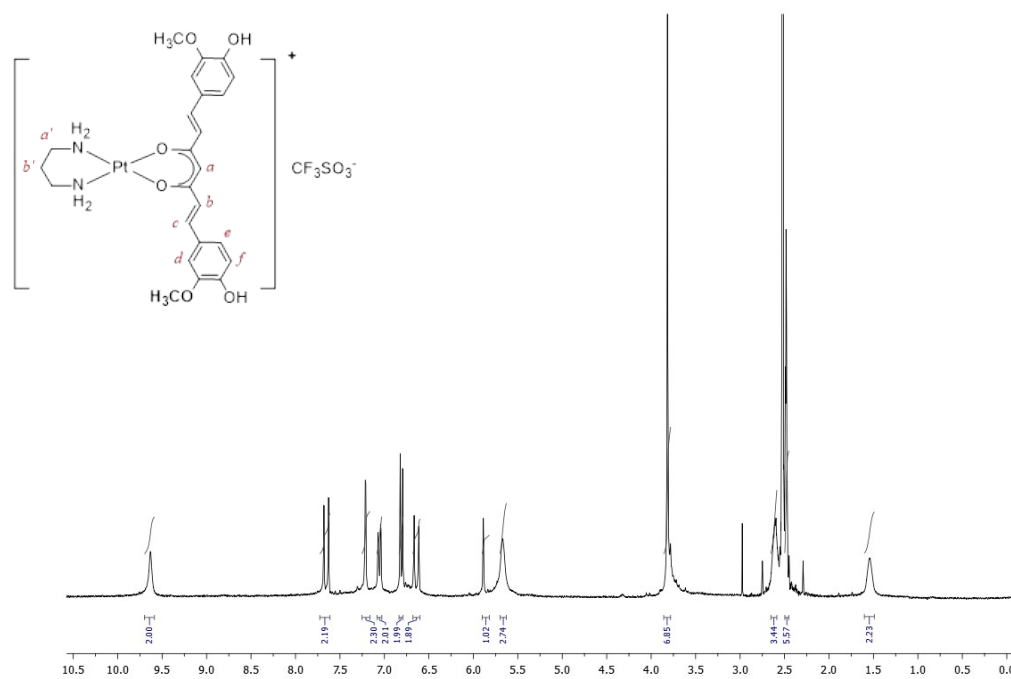

**Figure S3:**  $^1H$ -NMR spectrum of complex  $[(pn)Pt(curc)][CF_3SO_3]$ , **1**.

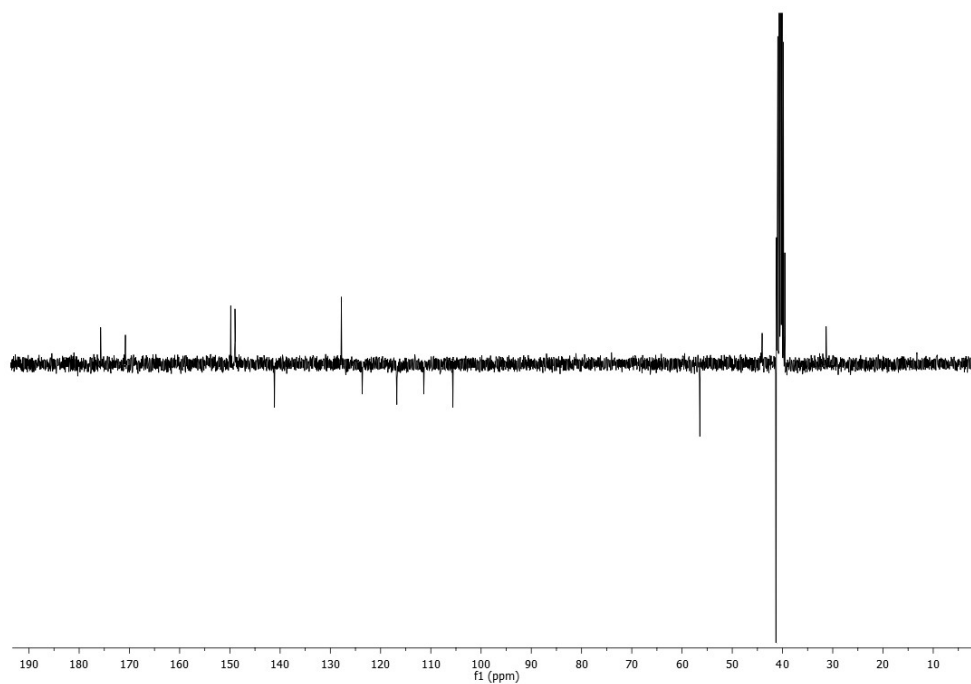

Figure S4: <sup>13</sup>C-NMR spectrum of complex [(pn)Pt(curc)][CF<sub>3</sub>SO<sub>3</sub>], **1**.

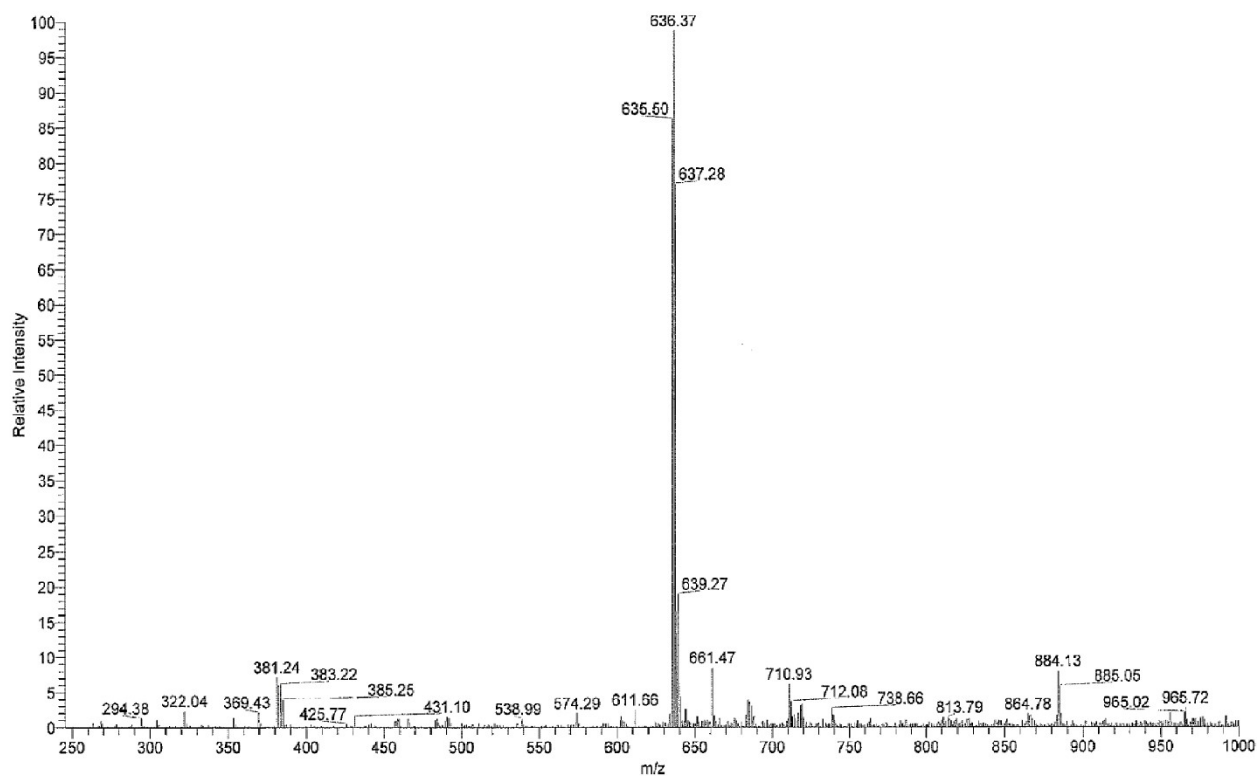

Figure S5: MS spectrum of complex [(pn)Pt(curc)][CF<sub>3</sub>SO<sub>3</sub>], **1**

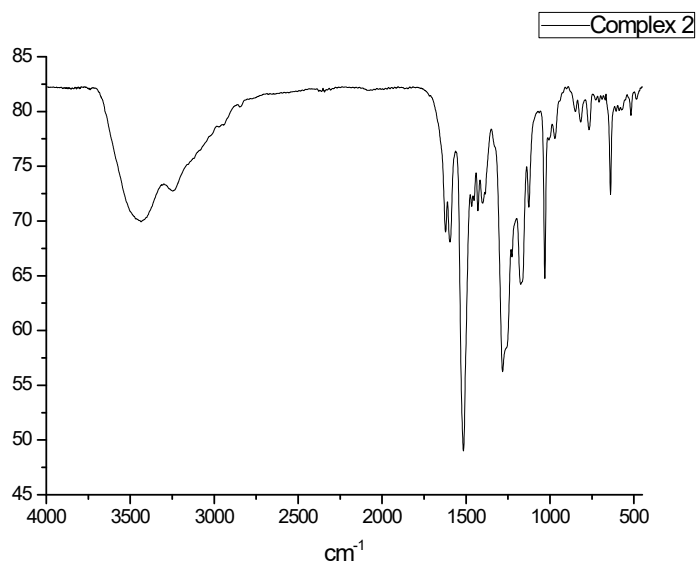

Figure S6: FT-IR spectrum of complex  $[(pic)Pt(curc)][CF_3SO_3]$ , **2**.

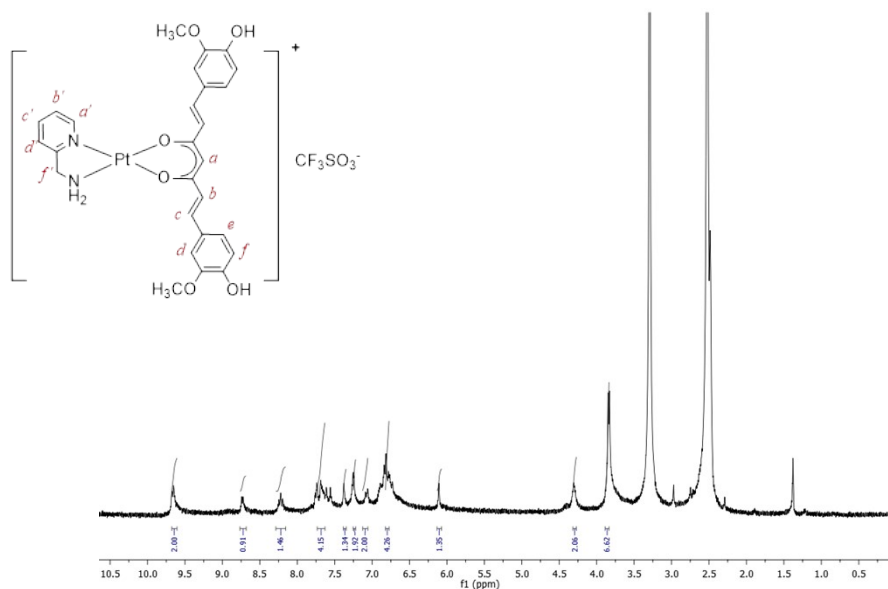

Figure S7:  $^1H$ -NMR spectrum of complex  $[(pic)Pt(curc)][CF_3SO_3]$ , **2**.

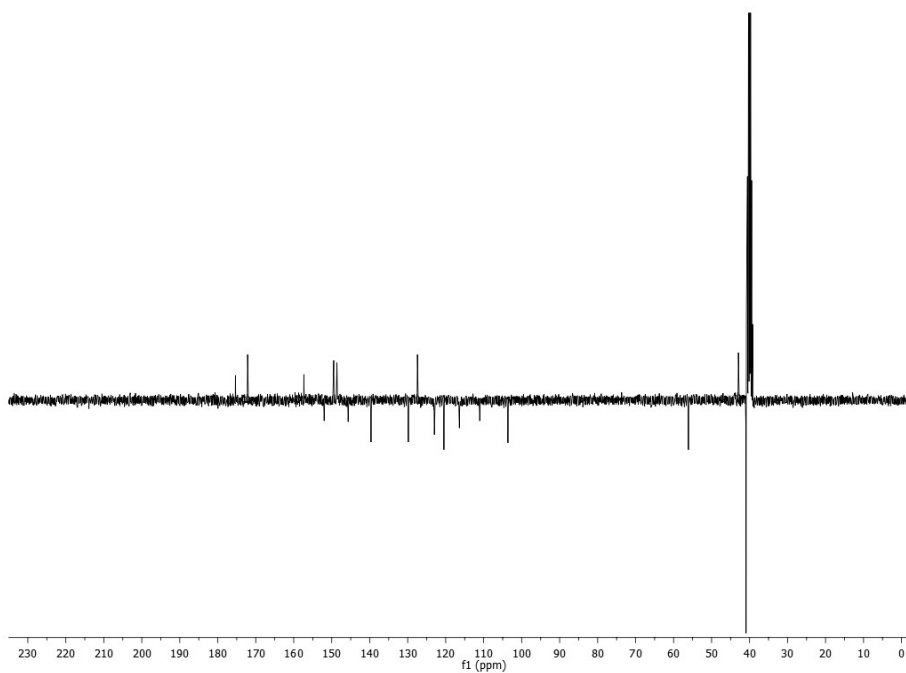

Figure S8: <sup>13</sup>C-NMR spectrum of complex [(pic)Pt(curc)][CF<sub>3</sub>SO<sub>3</sub>], **2**.

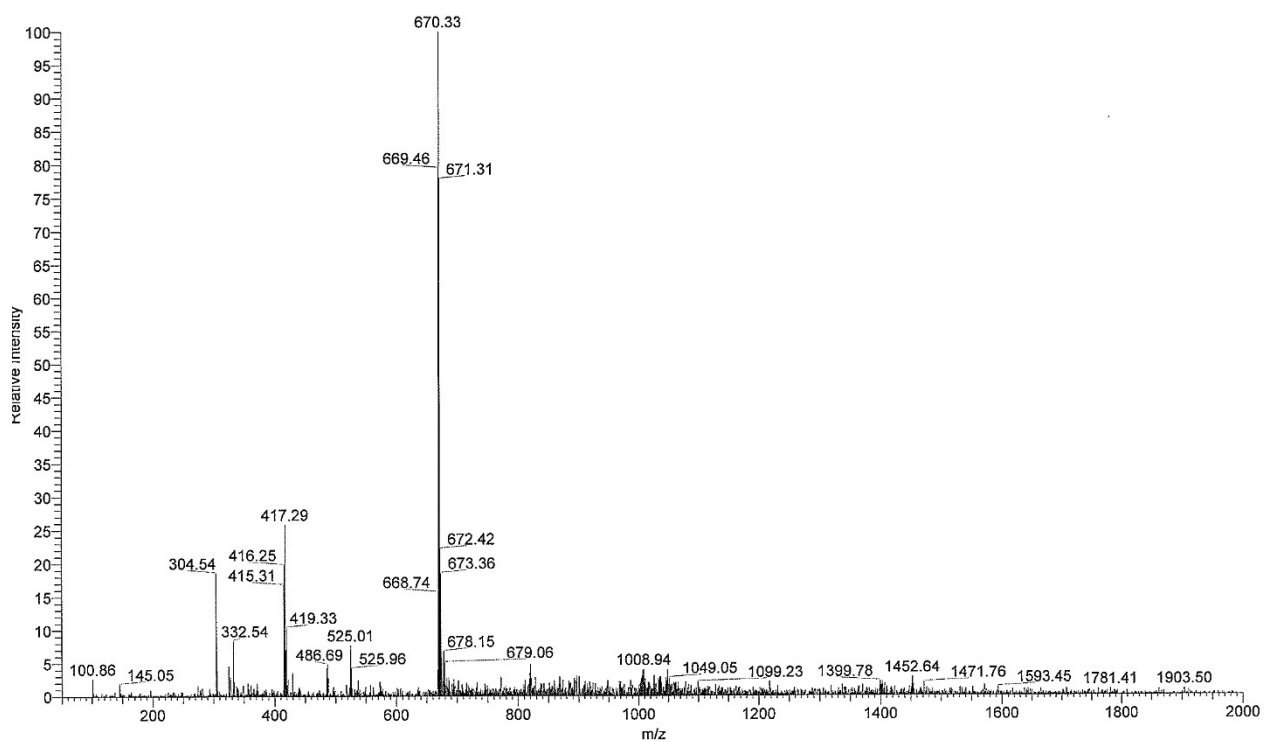

Figure S9: MS spectrum of complex [(pic)Pt(curc)][CF<sub>3</sub>SO<sub>3</sub>], **2**.

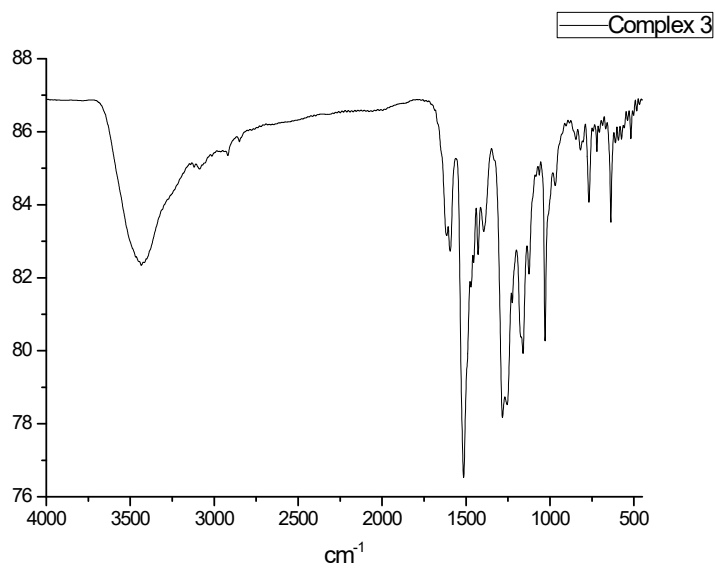

**Figure S10:** FT-IR spectrum of complex[(bipy)Pt(curc)][CF<sub>3</sub>SO<sub>3</sub>], **3**.

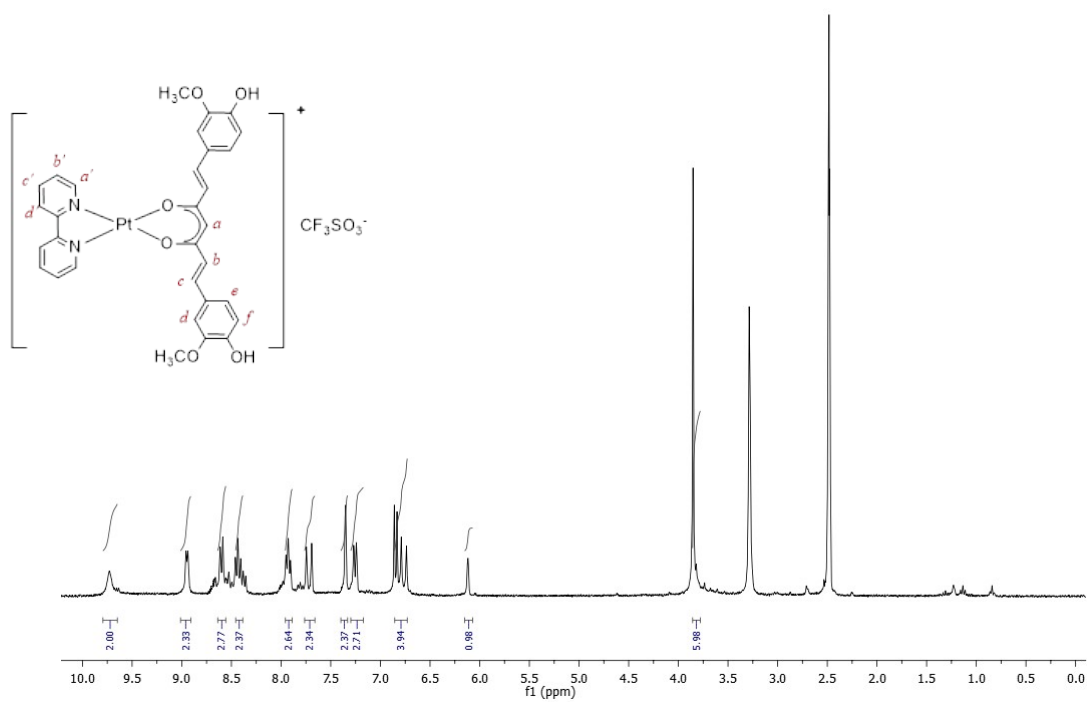

**Figure S11:** <sup>1</sup>H-NMR spectrum of complex [(bipy)Pt(curc)][CF<sub>3</sub>SO<sub>3</sub>], **3**.



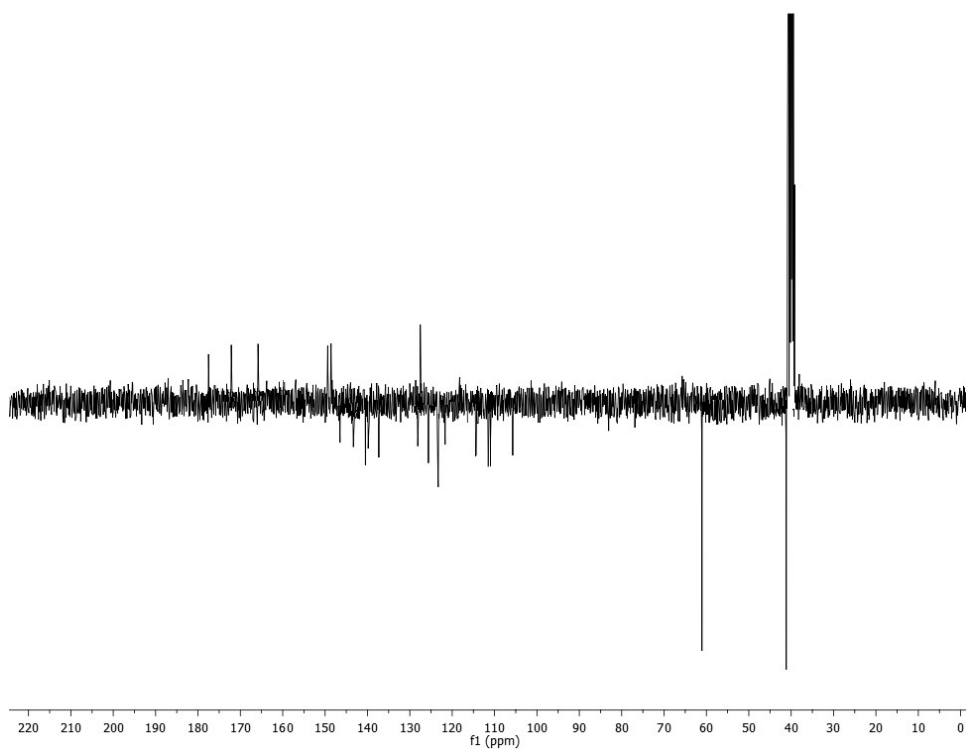

Figure S12:  $^{13}\text{C}$ -NMR spectrum of complex  $[(\text{bipy})\text{Pt}(\text{curc})][\text{CF}_3\text{SO}_3]$ , **3**.

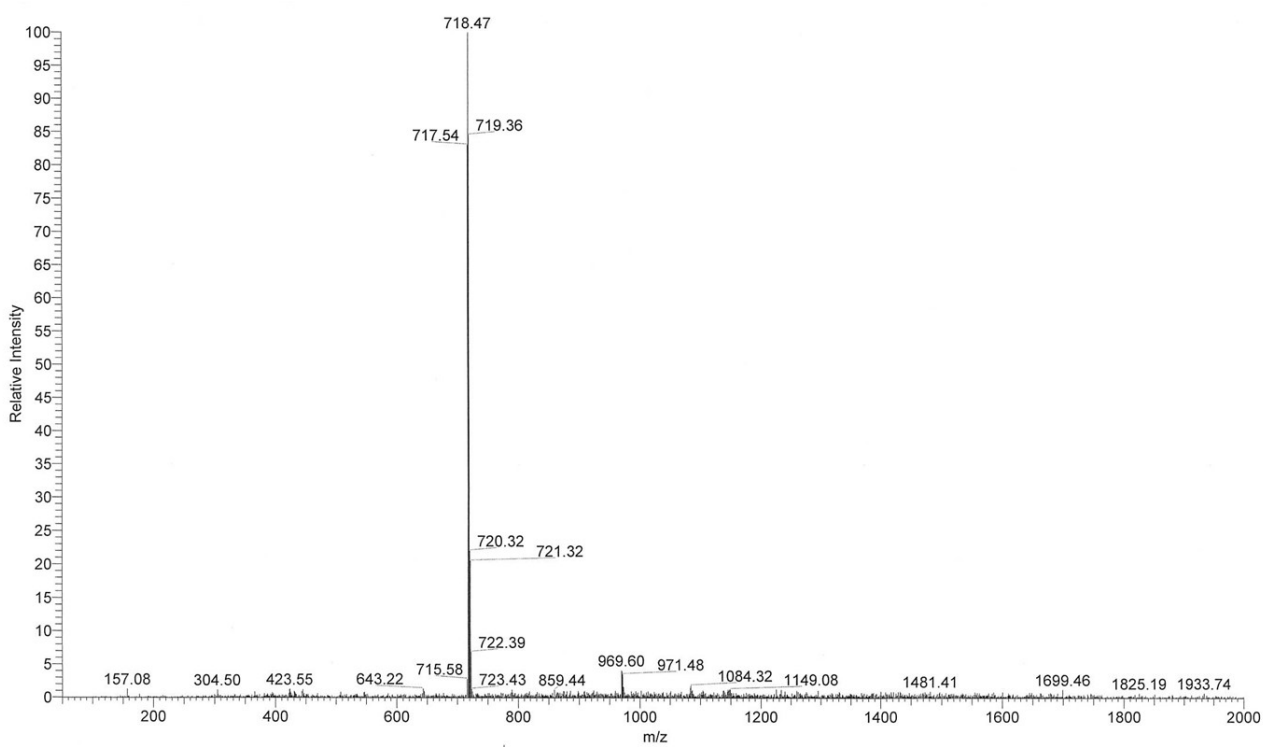

Figure S13: MS spectrum of complex  $[(\text{bipy})\text{Pt}(\text{curc})][\text{CF}_3\text{SO}_3]$ , **3**.

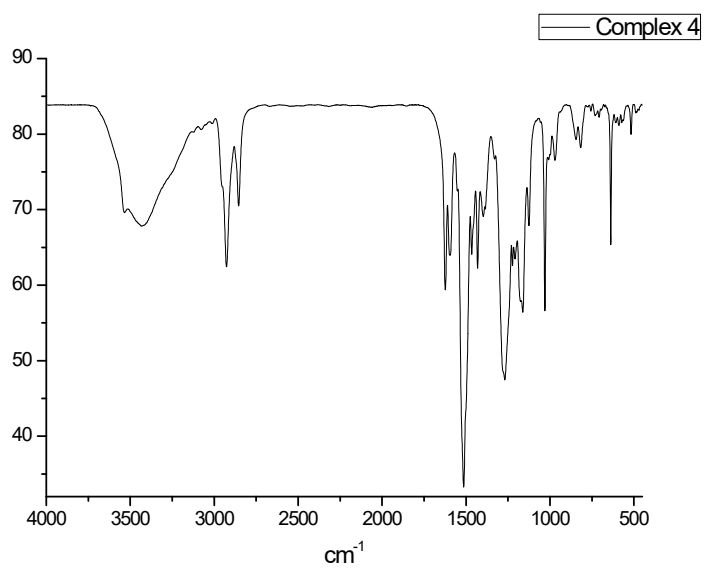

Figure S14: FT-IR spectrum of complex [(bipy-C<sub>9</sub>)Pt(curc)][CF<sub>3</sub>SO<sub>3</sub>], **4**.

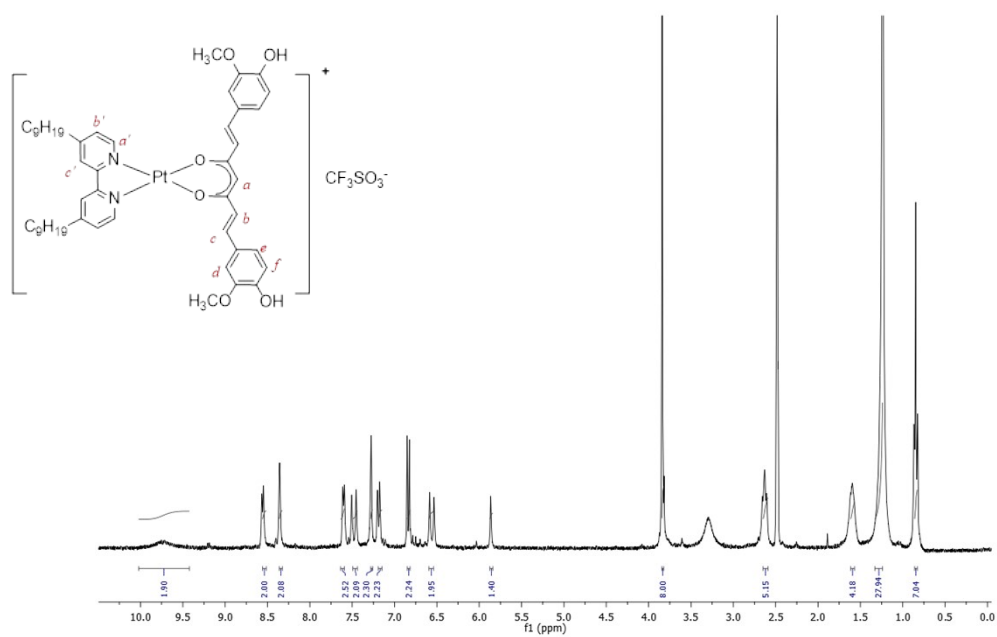

Figure S15: <sup>1</sup>H-NMR spectrum of complex [(bipy-C<sub>9</sub>)Pt(curc)][CF<sub>3</sub>SO<sub>3</sub>], **4**.

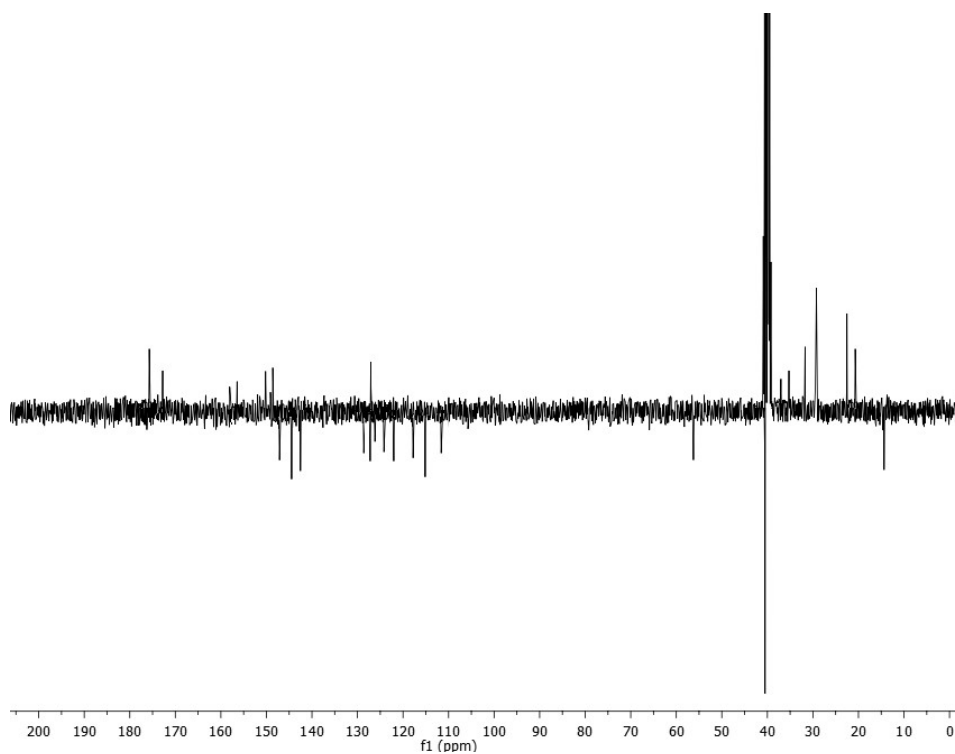

**Figure S16:**  $^{13}\text{C}$ -NMR spectrum of complex  $[(\text{bipy-C}_9)\text{Pt}(\text{curc})][\text{CF}_3\text{SO}_3]$ , **4**.

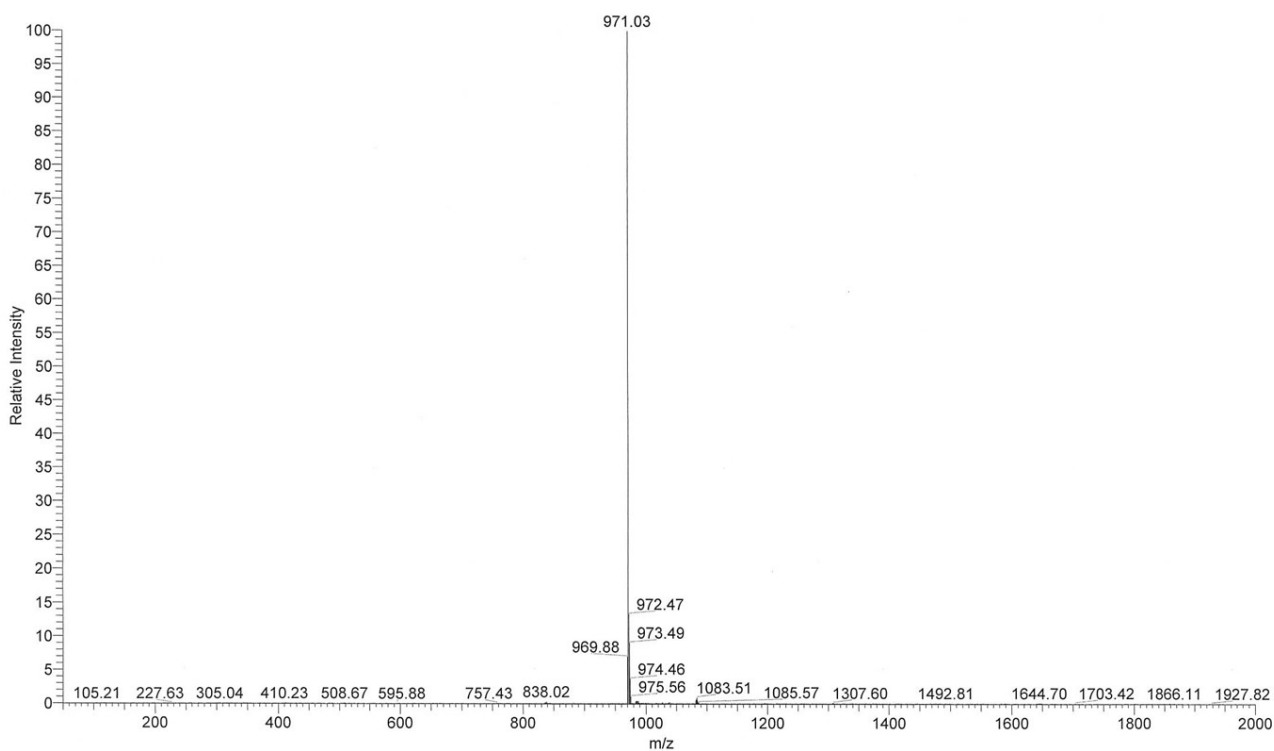

**Figure S17:** MS spectrum of complex  $[(\text{bipy-C}_9)\text{Pt}(\text{curc})][\text{CF}_3\text{SO}_3]$ , **4**.

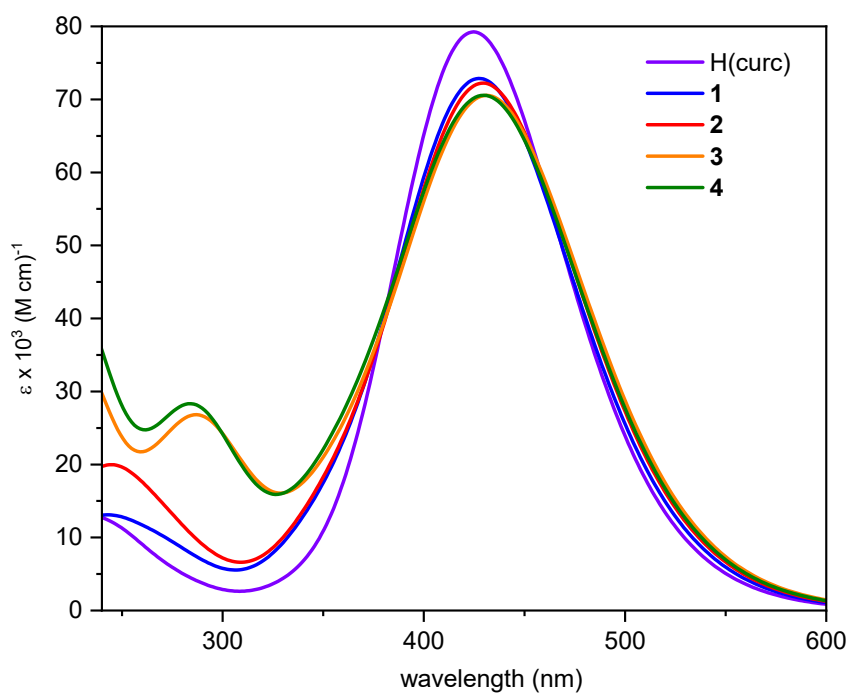

**Figure S18:** Simulated absorption spectra of **H(curc)** (violet) and complexes **1** (blue), **2** (red), **3** (orange) and **4** (green) in implicit solvent methanol.

**Table S1:** Absorption wavelength ( $\lambda$ , nm), oscillator strength ( $f$ ), MO contribution (%) for H(curc) and its Pt(II) cationic complexes **1-4**.

| Comp           | Band      | $\lambda$ | $f^a$ | MO contribution <sup>b</sup>                                                     | Theoretical Assignment                 |
|----------------|-----------|-----------|-------|----------------------------------------------------------------------------------|----------------------------------------|
| <b>H(curc)</b> | <b>I</b>  | 425       | 1.949 | H $\rightarrow$ L 94%                                                            | $\pi\pi^*$                             |
|                | <b>II</b> | 257       | 0.105 | H-1 $\rightarrow$ L+1 67%                                                        | $\pi\pi^*$                             |
|                |           | 243       | 0.107 | H $\rightarrow$ L+3 34%<br>H-1 $\rightarrow$ L+2 18%                             |                                        |
| <b>1</b>       | <b>I</b>  | 430       | 1.749 | H $\rightarrow$ L 93%                                                            | LMCT                                   |
|                |           | 361       | 0.308 | H-1 $\rightarrow$ L 93%                                                          | LC/MLCT                                |
|                | <b>II</b> | 259       | 0.122 | H-1 $\rightarrow$ L+1 57%<br>H $\rightarrow$ L+3 16%                             | MLCT/LC <sub>curc</sub>                |
| <b>2</b>       | <b>I</b>  | 432       | 1.725 | H $\rightarrow$ L 93%                                                            | LMCT                                   |
|                |           | 363       | 0.349 | H-1 $\rightarrow$ L 92%                                                          | LC/MLCT                                |
|                | <b>II</b> | 260       | 0.130 | H-1 $\rightarrow$ L+2 41%                                                        | MLCT/LC <sub>curc</sub>                |
| <b>3</b>       | <b>I</b>  | 435       | 1.665 | H $\rightarrow$ L 93%                                                            | LMCT                                   |
|                |           | 366       | 0.417 | H-1 $\rightarrow$ L 89%                                                          | LC/MLCT                                |
|                | <b>II</b> | 307       | 0.131 | H-2 $\rightarrow$ L+1 40%, H-4 $\rightarrow$ L+1 33%                             | LC <sub>bipy</sub>                     |
|                |           | 293       | 0.309 | H-5 $\rightarrow$ L+1 70%                                                        | L <sub>curc</sub> L <sub>bipy</sub> CT |
| <b>4</b>       | <b>I</b>  | 434       | 1.657 | H $\rightarrow$ L 93%                                                            | LMCT                                   |
|                |           | 366       | 0.441 | H-1 $\rightarrow$ L 90%                                                          | LC/MLCT                                |
|                | <b>II</b> | 303       | 0.180 | H-2 $\rightarrow$ L+1 36%, H-3 $\rightarrow$ L 25%,<br>H-4 $\rightarrow$ L+1 20% | LC <sub>bipy</sub>                     |
|                |           | 287       | 0.344 | H-5 $\rightarrow$ L+1 61%                                                        | L <sub>curc</sub> L <sub>bipy</sub> CT |

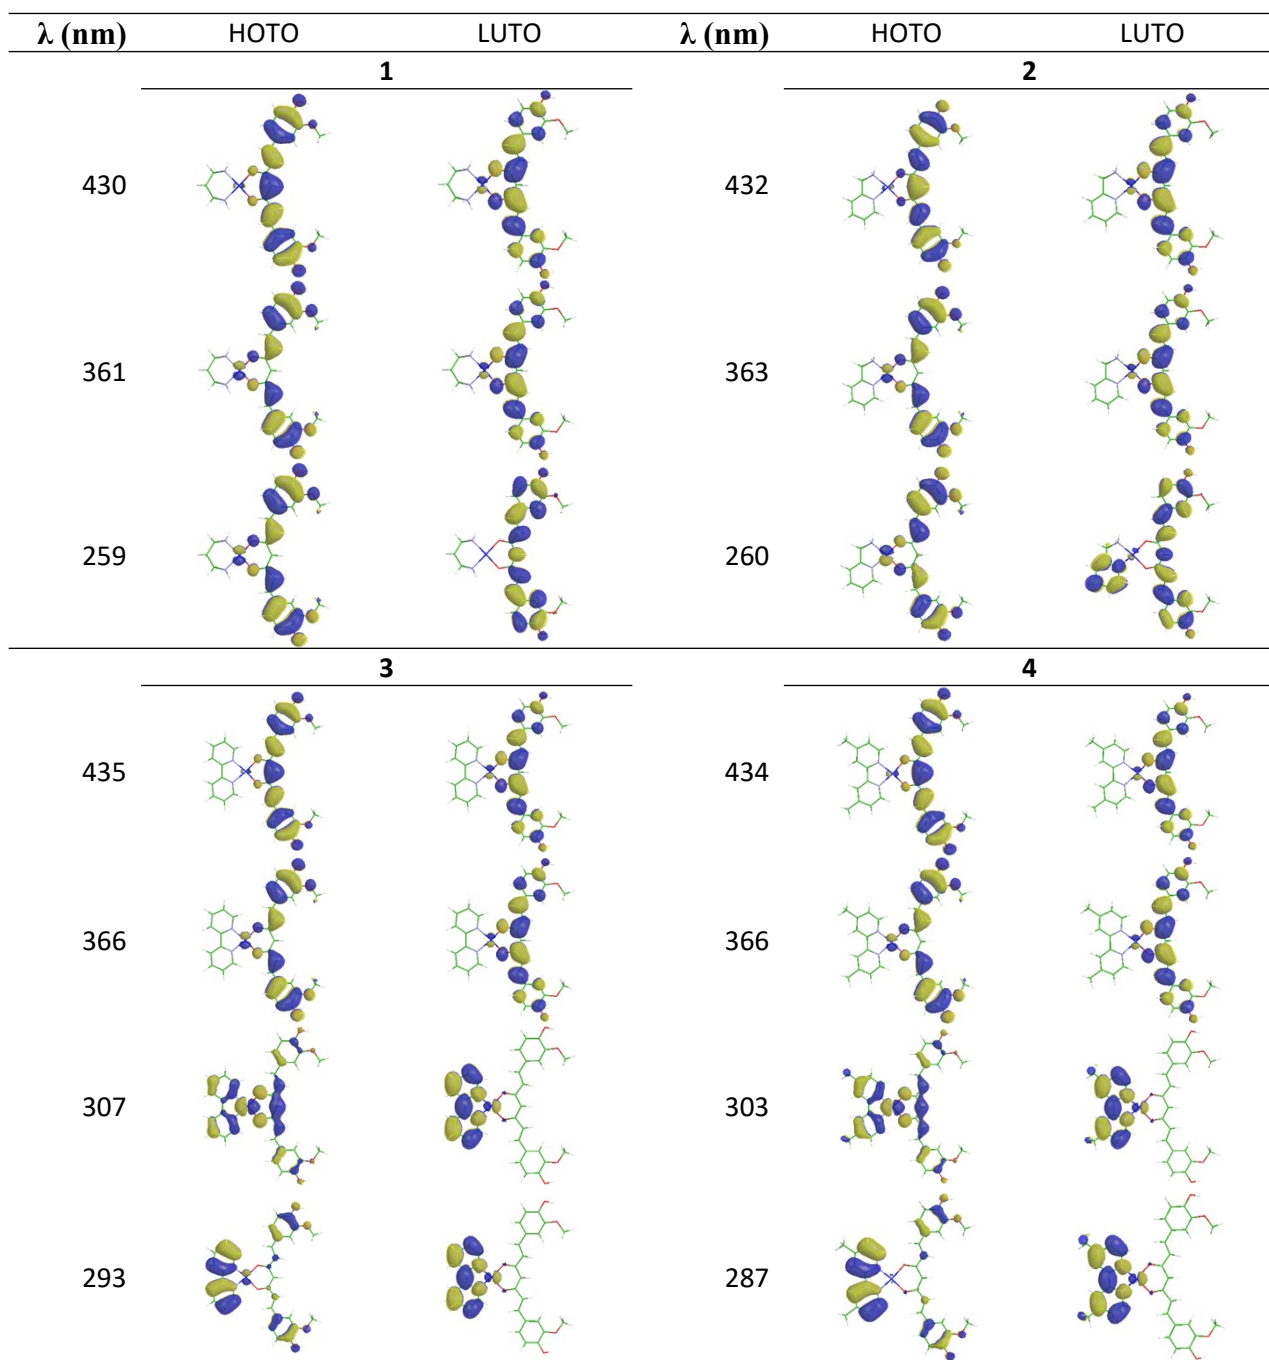

**Figure S19:** Natural Transition Orbitals (NTOs) for the main excitations of Pt(II) complexes **1-4**.

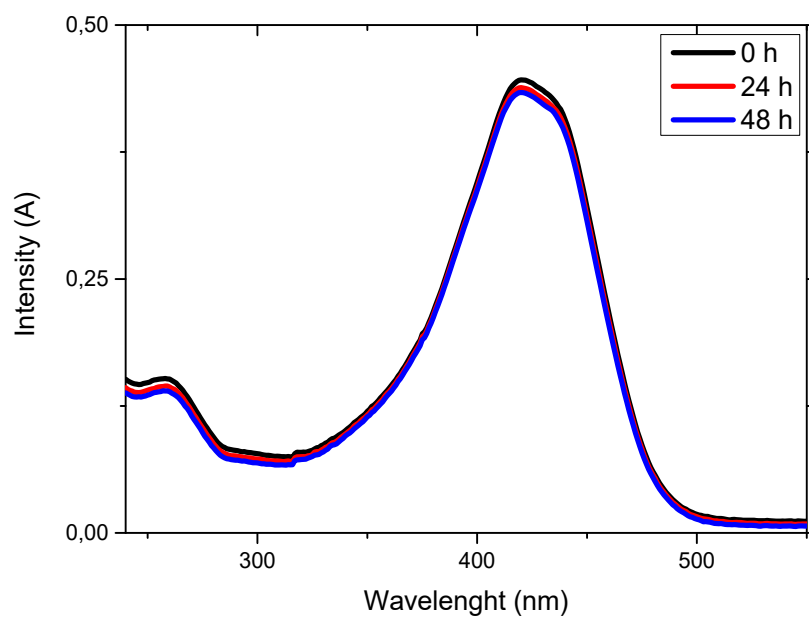

**Figure S20:** Absorption spectra of **H(curc)** in MeOH dilute solution (10 μM) varying time.

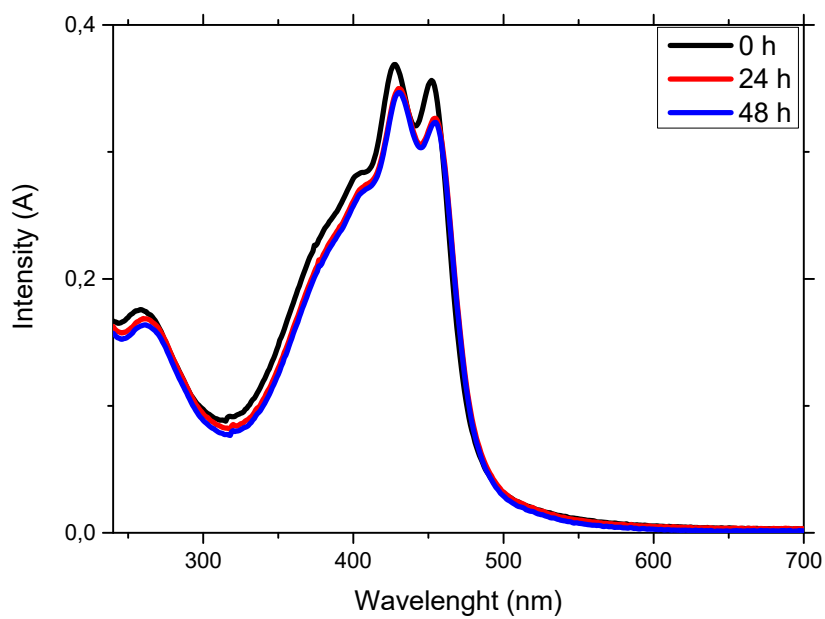

**Figure S21:** Absorption spectra of complex **1** in MeOH dilute solution (10 μM) varying time.

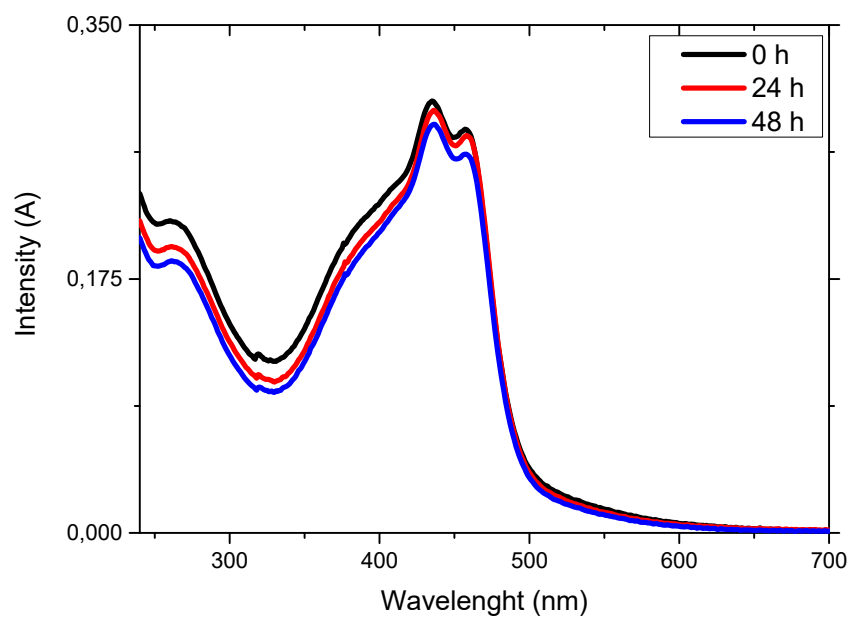

**Figure S22:** Absorption spectra of complex 2 in MeOH dilute solution (10 μM) varying time.

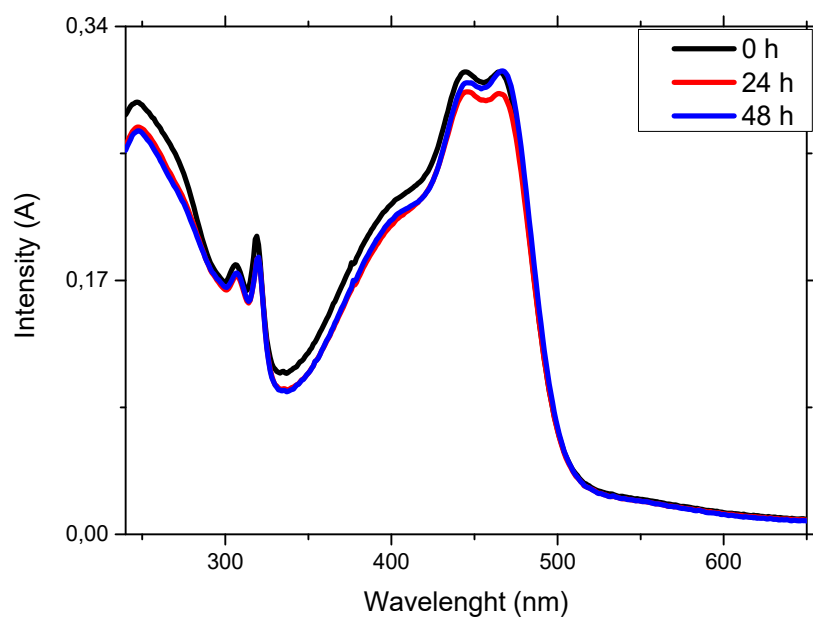

**Figure S23:** Absorption spectra of complex 3 in MeOH dilute solution (10 μM) varying time.

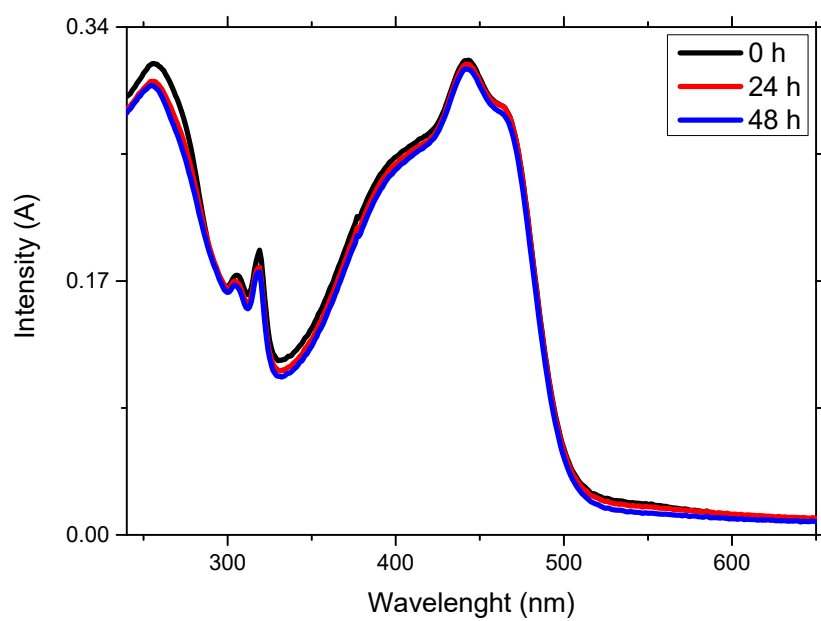

**Figure S24:** Absorption spectra of complex 4 in MeOH dilute solution (10 μM) varying time.

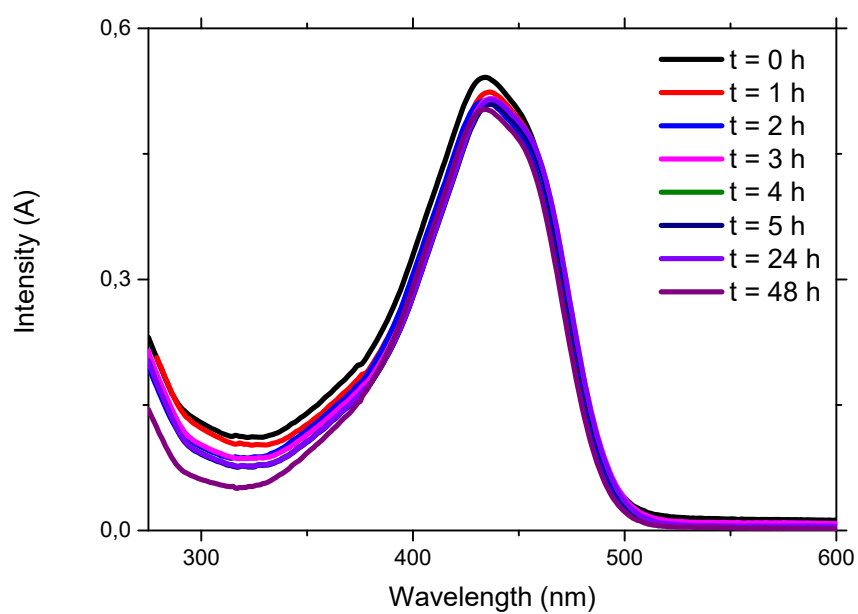

**Figure S25:** Absorption spectra of H(curc) in DMSO dilute solution (10 μM) varying time.



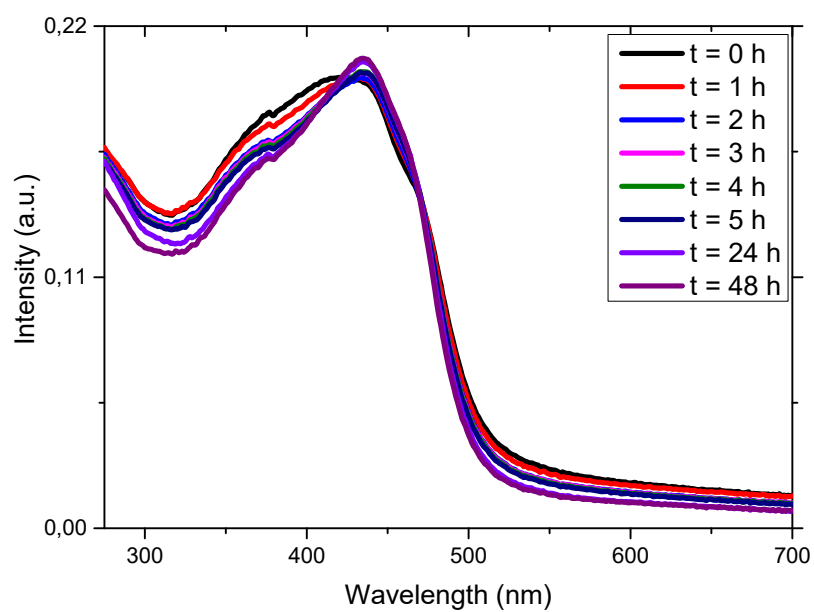

**Figure S26:** Absorption spectra of complex **1** in DMSO dilute solution (10 μM) varying time.

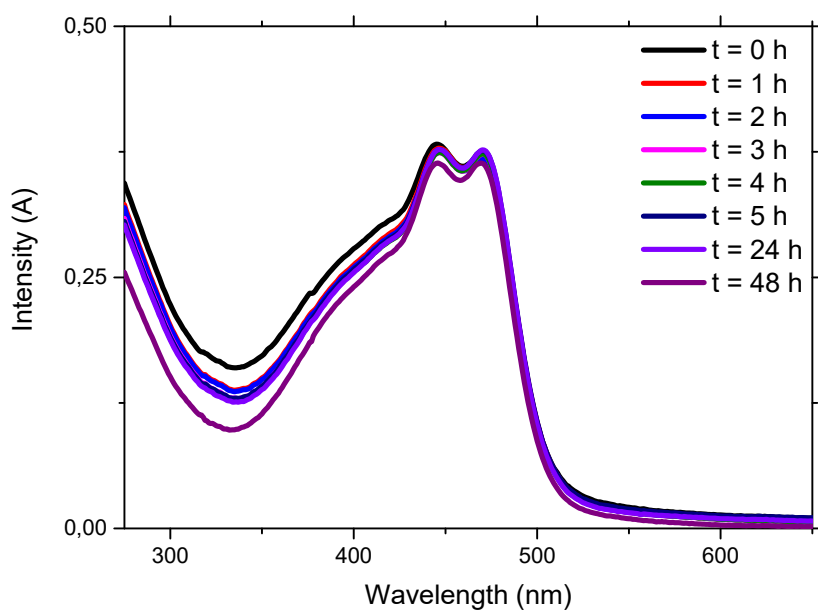

**Figure S27:** Absorption spectra of complex **2** in DMSO dilute solution (10 μM) varying time.

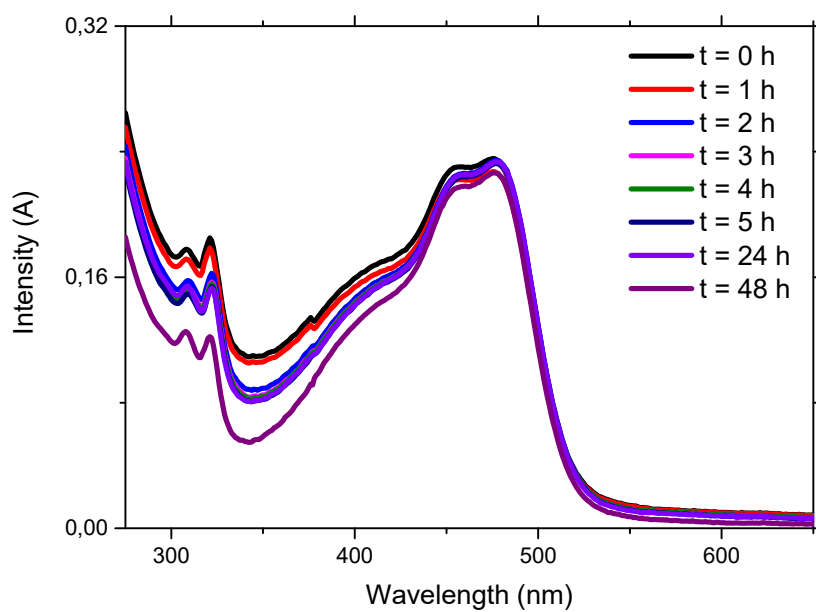

**Figure S28:** Absorption spectra of complex **3** in DMSO dilute solution (10  $\mu$ M) varying time.

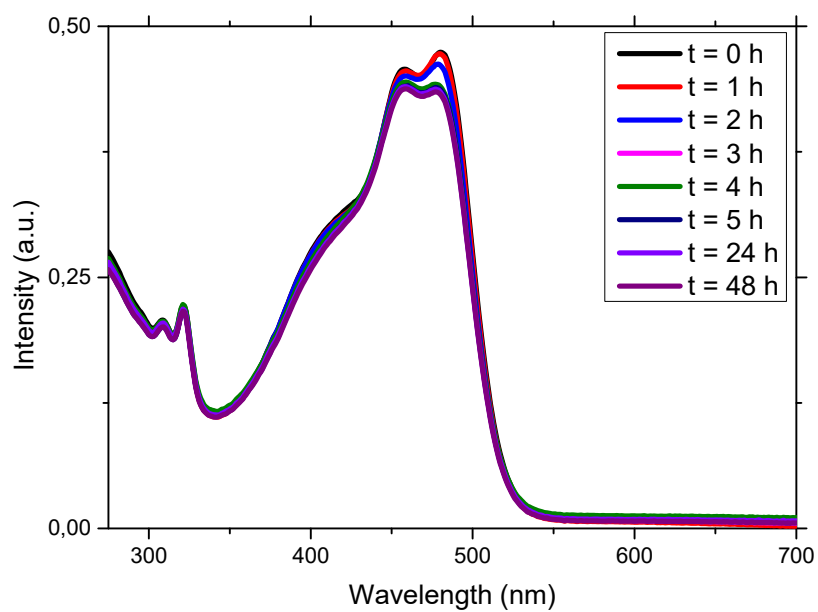

**Figure S29:** Absorption spectra of complex **4** in DMSO dilute solution (10  $\mu$ M) varying time.

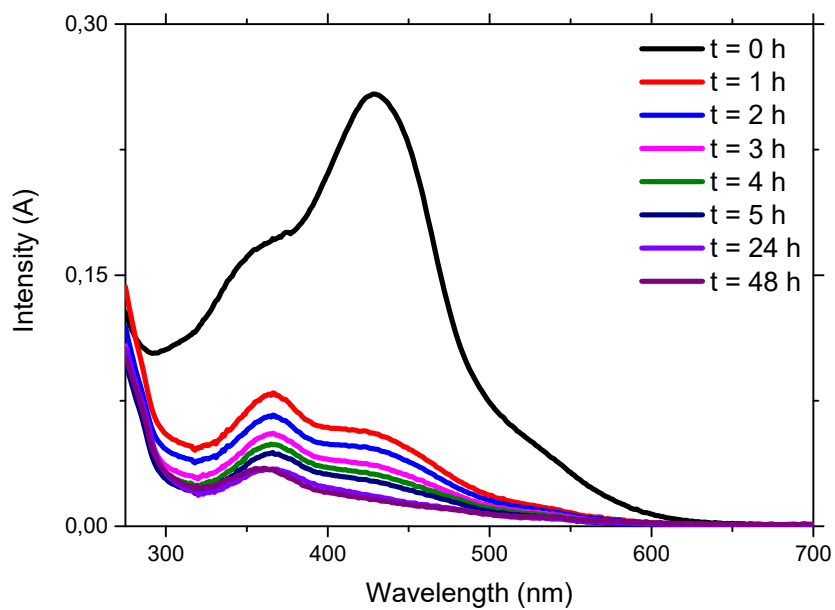

**Figure S30:** Absorption spectra of **H(curc)** in 10% DMSO/PBS dilute solution (10  $\mu$ M) varying time.

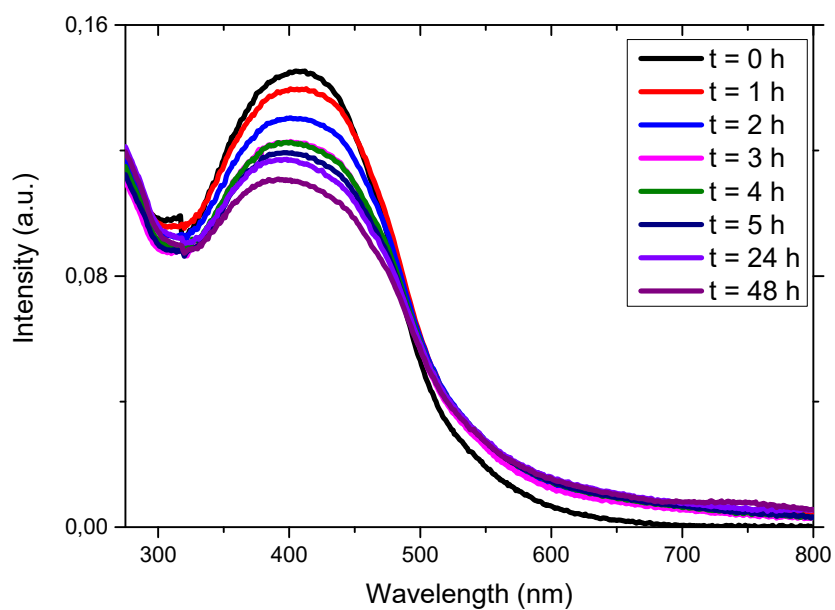

**Figure S31:** Absorption spectra of complex **1** in 10% DMSO/PBS dilute solution (10  $\mu$ M) varying time.

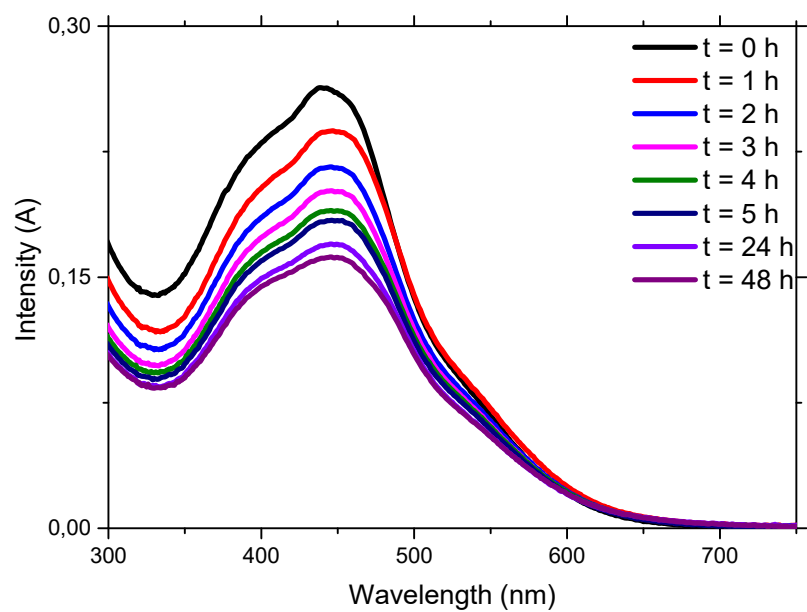

**Figure S32:** Absorption spectra of complex **2** in 10% DMSO/PBS dilute solution (10  $\mu$ M) varying time.

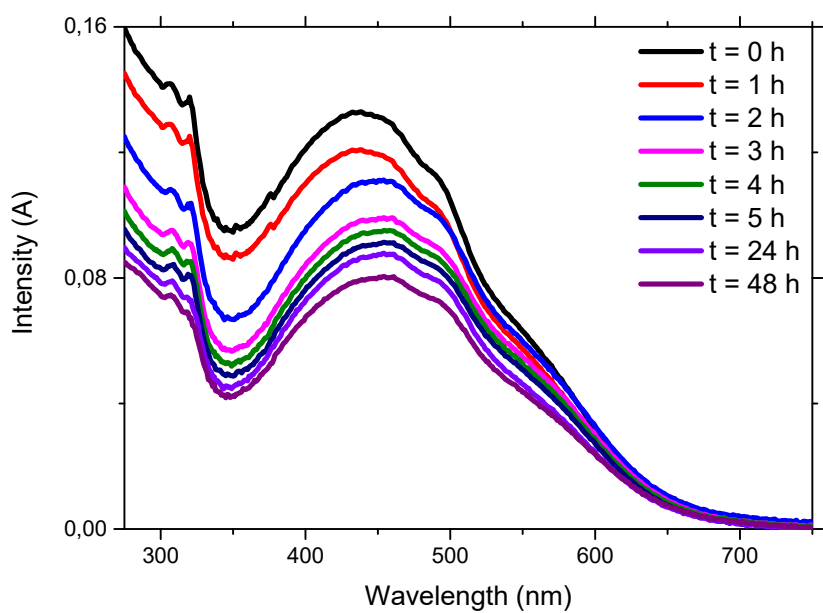

**Figure S33:** Absorption spectra of complex **3** in 10% DMSO/PBS dilute solution (10  $\mu$ M) varying time.

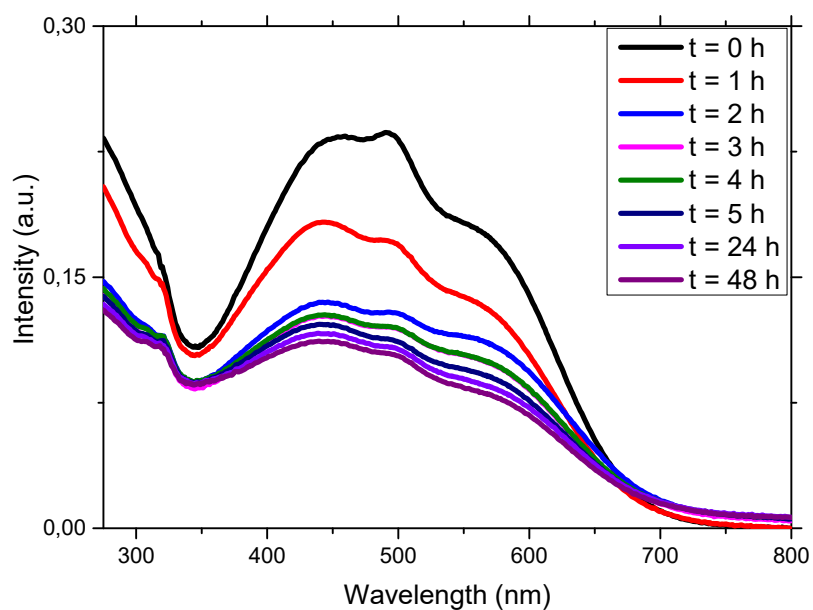

**Figure S34:** Absorption spectra of complex **4** in 10% DMSO/PBS dilute solution (10  $\mu$ M) varying time.

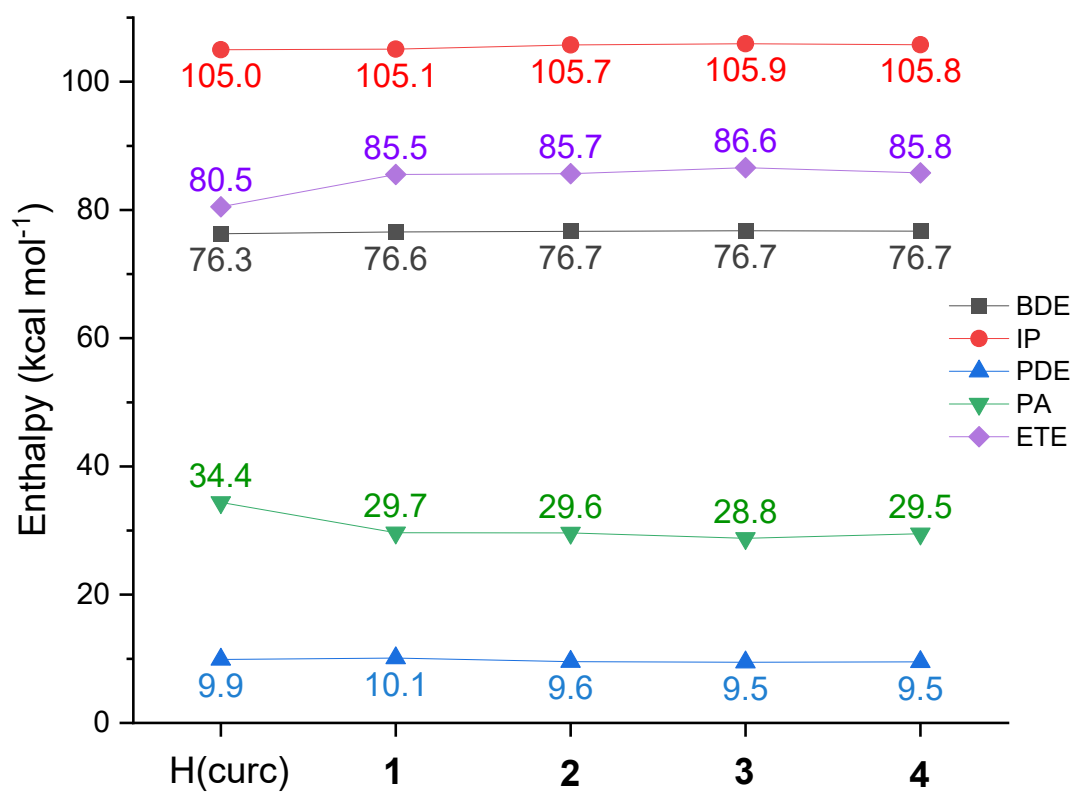

**Figure S35:** Thermodynamic parameters: bond dissociation enthalpies (BDE, grey), electron transfer enthalpies (ETE, light violet), adiabatic ionization potentials (IP, red), O–H proton dissociation enthalpies (PDE, blue) and proton affinities (PA, green), at 298.15 K.

**Table S2:** ADME properties of the Pt(II) complexes 1-4.

|                       | 1      | 2      | 3      | 4      |
|-----------------------|--------|--------|--------|--------|
| MW (g/mol)            | 636.57 | 670.59 | 718.63 | 971.11 |
| H-bond acceptors      | 6      | 6      | 6      | 6      |
| H-bond donors         | 4      | 3      | 2      | 2      |
| TPSA (Å)              | 126.28 | 113.55 | 92.98  | 100.82 |
| LogS                  | -5.88  | -6.67  | -7.96  | -14.11 |
| GI absorption         | High   | High   | High   | Low    |
| BBB permeant          | No     | No     | No     | No     |
| Lipinski #violations  | 1      | 1      | 1      | 2      |
| Bioavailability Score | 0.56   | 0.56   | 0.56   | 0.56   |

**Table S3.** Theoretical and experimental logP<sub>ow</sub> values of the Pt(II) complexes 1-4.

|                                    | 1     | 2    | 3    | 4    |
|------------------------------------|-------|------|------|------|
| LogP <sub>ow</sub> <sup>theo</sup> | -0.32 | 0.89 | 2.69 | 8.01 |
| logP <sub>ow</sub> <sup>exp</sup>  | 2.79  | 3.22 | 3.65 | 8.12 |

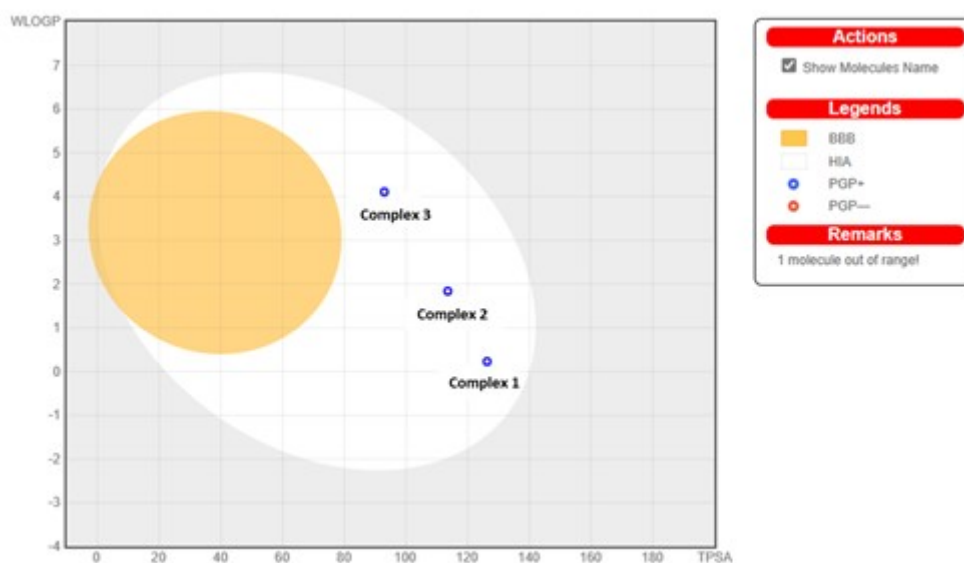

**Figure S36: BOILED-Egg Model of complexes 1-3.**

|                | Complex Concentration ( $\mu\text{g}/\mu\text{L}$ ) |                |                |                |                |                |
|----------------|-----------------------------------------------------|----------------|----------------|----------------|----------------|----------------|
|                | 0.05                                                | 0.1            | 0.2            | 0.3            | 0.4            | 0.5            |
| <b>H(curc)</b> | 0                                                   | $0.20 \pm 0.5$ | $0.60 \pm 0.4$ | $0.80 \pm 0.1$ | $1.35 \pm 0.3$ | $1.99 \pm 0.1$ |
| <b>1</b>       | $0.50 \pm 0.3$                                      | $0.90 \pm 0.1$ | $1.25 \pm 0.1$ | $1.78 \pm 0.1$ | $2.11 \pm 0.2$ | $2.31 \pm 0.2$ |
| <b>2</b>       | $0.50 \pm 0.2$                                      | $1.08 \pm 0.1$ | $1.40 \pm 0.2$ | $2.10 \pm 0.1$ | $2.40 \pm 0.1$ | $2.60 \pm 0.1$ |
| <b>3</b>       | $0.97 \pm 0.3$                                      | $1.50 \pm 0.2$ | $1.70 \pm 0.3$ | $2.45 \pm 0.2$ | $2.70 \pm 0.2$ | $2.88 \pm 0.1$ |
| <b>4</b>       | $1.57 \pm 0.5$                                      | $2.00 \pm 0.3$ | $2.55 \pm 0.2$ | $2.67 \pm 0.1$ | $2.93 \pm 0.2$ | $3.12 \pm 0.1$ |
| <b>DMSO</b>    | 0                                                   | 0              | 0              | 0              | 0              | 0              |

|                | Complex Concentration ( $\mu\text{g}/\mu\text{L}$ ) |                |                |                 |                |                |
|----------------|-----------------------------------------------------|----------------|----------------|-----------------|----------------|----------------|
|                | 0.05                                                | 0.1            | 0.2            | 0.3             | 0.4            | 0.5            |
| <b>H(curc)</b> | 0                                                   | 0              | 0              | $0.80 \pm 0.2$  | $1.30 \pm 0.1$ | $1.80 \pm 0.2$ |
| <b>1</b>       | 0                                                   | $0.26 \pm 0.1$ | $0.52 \pm 0.4$ | $1.08 \pm 0.2$  | $1.6 \pm 0.4$  | $2.06 \pm 0.1$ |
| <b>2</b>       | 0                                                   | 0              | $0.30 \pm 0.2$ | $0.60 \pm 0.3$  | $0.80 \pm 0.2$ | $1.00 \pm 0.4$ |
| <b>3</b>       | 0                                                   | $0.15 \pm 0.2$ | $0.80 \pm 0.5$ | $1.40 \pm 0.04$ | $1.90 \pm 0.3$ | $2.37 \pm 0.1$ |
| <b>4</b>       | 0                                                   | $0.40 \pm 0.1$ | $0.60 \pm 0.3$ | $1.80 \pm 0.6$  | $2.50 \pm 0.2$ | $3.00 \pm 0.1$ |
| <b>DMSO</b>    | 0                                                   | 0              | 0              | 0               | 0              | 0              |

**Table S4: Antimicrobial activity data against *E. coli* (on the top) and *S. aureus* (on the bottom). The diameter(mm) of growth inhibition area is subtracted from the disk diameter (6mm). The values are the mean of three replicates  $\pm$  standard deviation. 0= no alone.**

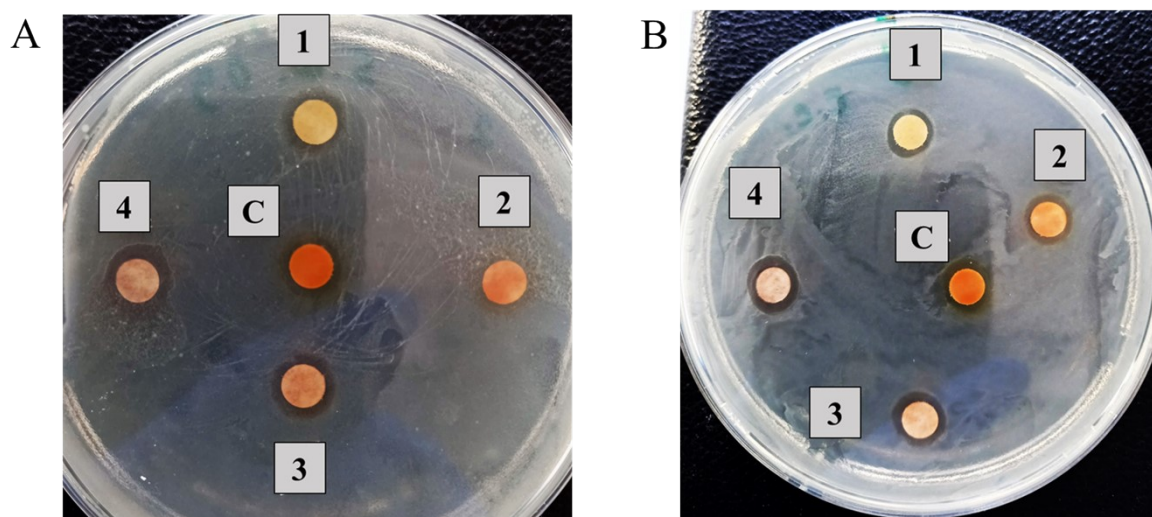

**Figure S37:** Inhibition halos on *S. aureus* (A) and *E. Coli* (B) at 0.5 µg/µl. C: H(curc).
